# Supplementary material
Source: publisher figshare collection journal article supplement (https://acs.figshare.com/ndownloader/files/3787531)
Supplement: Supplementary file 1 [file 3787531]

## **A Comparison of Methods to Enhance Protein Detection of Lipoproteins by Mass Spectrometry**

### **Supporting Information**

Anna Heink MS<sup>1</sup>, W. Sean Davidson PhD<sup>2</sup>, Debi K Swertfeger<sup>3</sup>, L. Jason Lu<sup>3</sup>, \*Amy S Shah MD MS<sup>1</sup>

<sup>1</sup>Department of Pediatrics, Cincinnati Children's Hospital Research Foundation, 3333 Burnet Avenue, MLC 7012, Cincinnati, OH 45229-3039, USA

<sup>2</sup>Center for Lipid and Arteriosclerosis Science, Department of Pathology and Laboratory Medicine, University of Cincinnati, 2120 East Galbraith Road, Cincinnati, OH 45237-0507, USA

<sup>3</sup>Division of Biomedical Informatics, Cincinnati Children's Hospital Research Foundation, 3333 Burnet Avenue, MLC 7024, Cincinnati, OH 45229-3039, USA  
Cincinnati Children's Hospital Medical Center, Division of Biomedical Informatics

\*Corresponding Author/Reprints: Amy S Shah MD MS. Cincinnati Children's Hospital Medical Center, Division of Endocrinology. 3333 Burnet Ave ML 7012. Cincinnati OH 45229. Email: [amy.shah@cchmc.org](mailto:amy.shah@cchmc.org). Phone: 513-636-4744. Fax: 513-696-7486.

**Supplement Figure 1:**

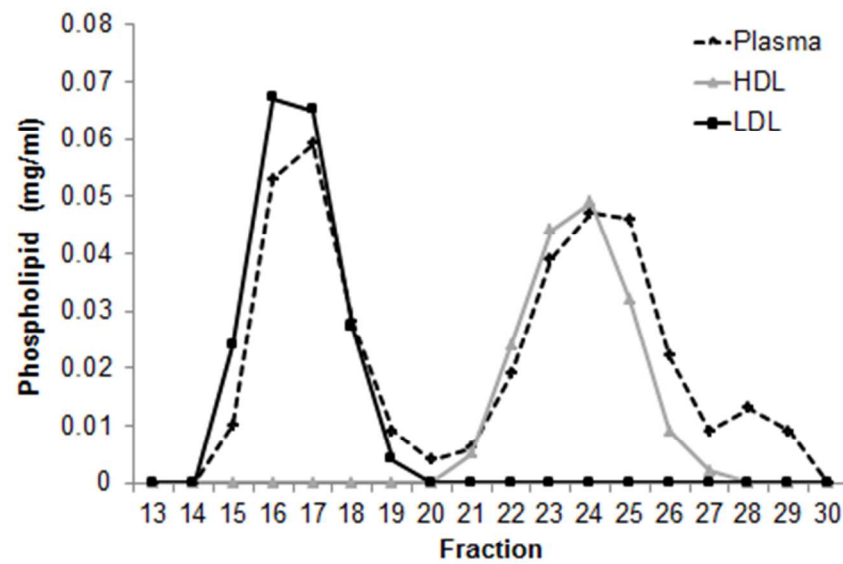

**Phospholipid content in fractions separated by gel-filtration of plasma vs. HDL and LDL separated by ultracentrifugation from a single subject.**

## Supplement Figure 2:

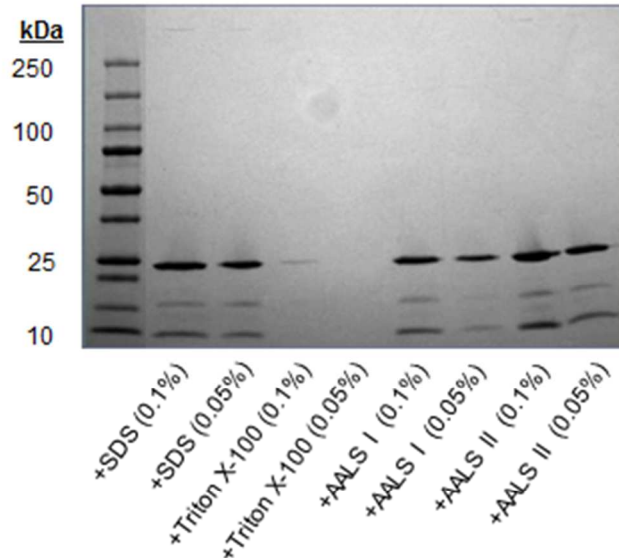

### Comparisons of protein elutions from the LRA with various detergents. SDS PAGE (4-15%)

comparison of UC-HDL protein elutions from LRA which were treated with the detergents SDS, Triton X-100, AALS I, or AALS II. 3.15 mg LRA from an LRA stock solution of 100 mg/ml was added to each experimental well of a 0.45  $\mu$ m filter plate (Millipore). 31.5  $\mu$ g of PL mass from UC isolated HDL in 50 mM AB buffer was then added and adjusted to a total volume of 50  $\mu$ l. The plate was then incubated for 30 minutes at RT. Flow-through was collected and the resin was washed three times with 150  $\mu$ l AB Buffer. Each detergent at concentrations of 0.1% and 0.05% was then added to each well in a total volume of 150  $\mu$ l AB Buffer and incubated for 30 minutes at RT. Samples were eluted from the LRA and the resin was washed twice more with 50  $\mu$ l AB Buffer. Equal volumes of 20  $\mu$ l from each sample were loaded onto the gel. The gel was stained with coomassie blue.

**Supplement Figure 3:**

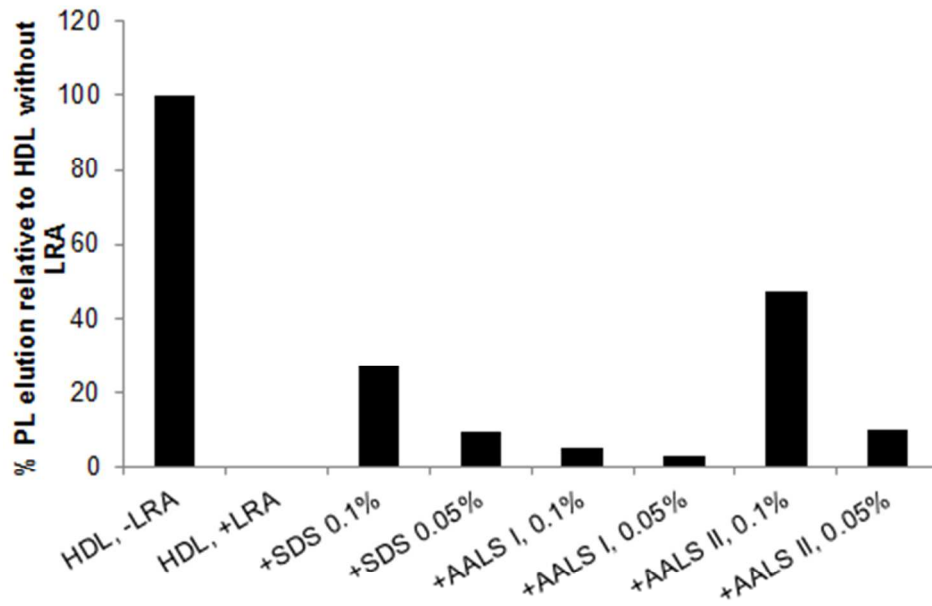

**Relative determination of phospholipid co-eluting with proteins off of the LRA.** UC-HDL was exchange-labeled with 0.5% rhodamine-phospholipid (AVANTI). Rhodamine-HDL was then incubated with LRA in the dark for 30 minutes. After eluting proteins from the LRA, fluorescence from eluted rhodamine-PL was measured (excitation: 557 nm, emission: 571 nm). All data is expressed as a percentage of rhodamine-phospholipid fluorescence relative to the control containing HDL with no LRA (HDL, -LRA).

**Supplement Table 1: HDL associated proteins by the method identified**

| Protein Identified              | LRA | LRA+AALS | OSD |
|---------------------------------|-----|----------|-----|
| Afamin                          |     | x        | x   |
| Alpha-1-acid glycoprotein 1     |     |          | x   |
| Alpha-1-acid glycoprotein 2     |     |          | x   |
| Alpha-1-antichymotrypsin        | x   | x        | x   |
| Alpha-1-antitrypsin             |     |          | x   |
| Alpha-1B-glycoprotein           |     | x        | x   |
| Alpha-2-antiplasmin             | x   | x        | x   |
| Alpha-2-HS-glycoprotein         | x   | x        | x   |
| Alpha-2-macroglobulin           | x   | x        | x   |
| Angiotensinogen                 | x   | x        | x   |
| Antithrombin-III                | x   | x        | x   |
| Apolipoprotein A-I              | x   | x        | x   |
| Apolipoprotein A-II             | x   | x        | x   |
| Apolipoprotein A-IV             | x   | x        | x   |
| Apolipoprotein B-100            |     | x        | x   |
| Apolipoprotein C-I              | x   | x        | x   |
| Apolipoprotein C-II             | x   | x        | x   |
| Apolipoprotein C-III            | x   | x        | x   |
| Apolipoprotein D                |     |          | x   |
| Apolipoprotein E                | x   | x        | x   |
| Apolipoprotein F                |     |          | x   |
| Apolipoprotein L1               | x   | x        | x   |
| Apolipoprotein M                |     | x        | x   |
| C4b-binding protein alpha chain |     |          | x   |
| Ceruloplasmin                   | x   | x        | x   |
| Clusterin                       | x   | x        | x   |
| Complement C1s subcomponent     | x   | x        | x   |
| Complement C2                   | x   | x        | x   |
| Complement C3                   | x   | x        | x   |
| Complement component C9         | x   | x        | x   |
| Complement factor B             | x   | x        | x   |
| Complement factor H             | x   | x        | x   |
| Fibrinogen alpha chain          | x   | x        | x   |
| Fibrinogen beta chain           | x   | x        | x   |
| Fibrinogen gamma chain          | x   | x        | x   |
| Fibronectin                     | x   | x        | x   |
| Gelsolin                        | x   | x        | x   |
| Haptoglobin                     | x   | x        | x   |
| Haptoglobin-related protein     | x   | x        | x   |
| Hemoglobin subunit beta         | x   | x        | x   |
| Hemopexin                       | x   | x        | x   |
| Heparin cofactor 2              | x   | x        | x   |
| Histidine-rich glycoprotein     | x   | x        | x   |
| Ig alpha-1 chain C region       | x   | x        | x   |

|                                                      |   |   |   |
|------------------------------------------------------|---|---|---|
| Ig gamma-1 chain C region                            | x | x | x |
| Ig kappa chain C region                              | x | x | x |
| Ig lambda-2 chain C regions                          | x | x | x |
| Inter-alpha-trypsin inhibitor heavy chain H1         | x | x | x |
| Inter-alpha-trypsin inhibitor heavy chain H2         | x | x | x |
| Inter-alpha-trypsin inhibitor heavy chain H4         | x | x | x |
| Kallistatin                                          | x | x | x |
| Kininogen-1                                          | x | x | x |
| Lumican                                              |   | x | x |
| N-acetylmuramoyl-L-alanine amidase                   | x | x | x |
| Phosphatidylinositol-glycan-specific phospholipase D | x | x | x |
| Pigment epithelium-derived factor                    | x | x | x |
| Plasma kallikrein 1                                  | x | x | x |
| Plasma protease C1 inhibitor                         | x | x | x |
| Plasminogen                                          | x | x | x |
| Protein AMBP                                         | x | x | x |
| Prothrombin                                          | x | x | x |
| Retinol-binding protein 4                            |   | x | x |
| Serotransferrin                                      |   | x | x |
| Serum albumin                                        | x | x | x |
| Serum amyloid P-component                            |   |   | x |
| Serum paraoxonase/arylesterase 1                     | x | x | x |
| Transthyretin                                        | x | x | x |
| Vitamin D-binding protein                            |   | x | x |
| Vitronectin                                          | x | x | x |
| Zinc-alpha-2-glycoprotein                            |   |   | x |
